# Supplementary material for: Thirty-Day Readmission Rates after Takotsubo Syndrome with or without Malignancy: A Nationwide Readmissions Database Analysis
Source: MDPI journal article supplement (doi:10.3390/jcm10163701), 2021-08-20
Supplement: s1 [file s1]

## Online Supplementary Materials

**Figure S1. Cumulative Density Function for Readmissions within 30 Days in Takotsubo syndrome**

**Table S1. Independent Predictors of In-hospital Mortality After Index Hospitalization With Takotsubo Syndrome**

**Table S2. Independent Predictors of 30-Day Total Mortality After Index Hospitalization With Takotsubo Syndrome**

**Table S3. Causes of Readmission in all Takotsubo Syndrome Patients**

**Table S4. Causes of Readmission in Takotsubo Syndrome Patients With Malignancy**

**Table S5. Causes of Readmission in Takotsubo Syndrome Patients Without Malignancy**

**Table S6. Costs and Charges over 30 Days After Index Hospitalization for Takotsubo syndrome With or Without Malignancy**

Figure S1. Cumulative Density Function for Readmissions within 30 Days in Takotsubo syndrome

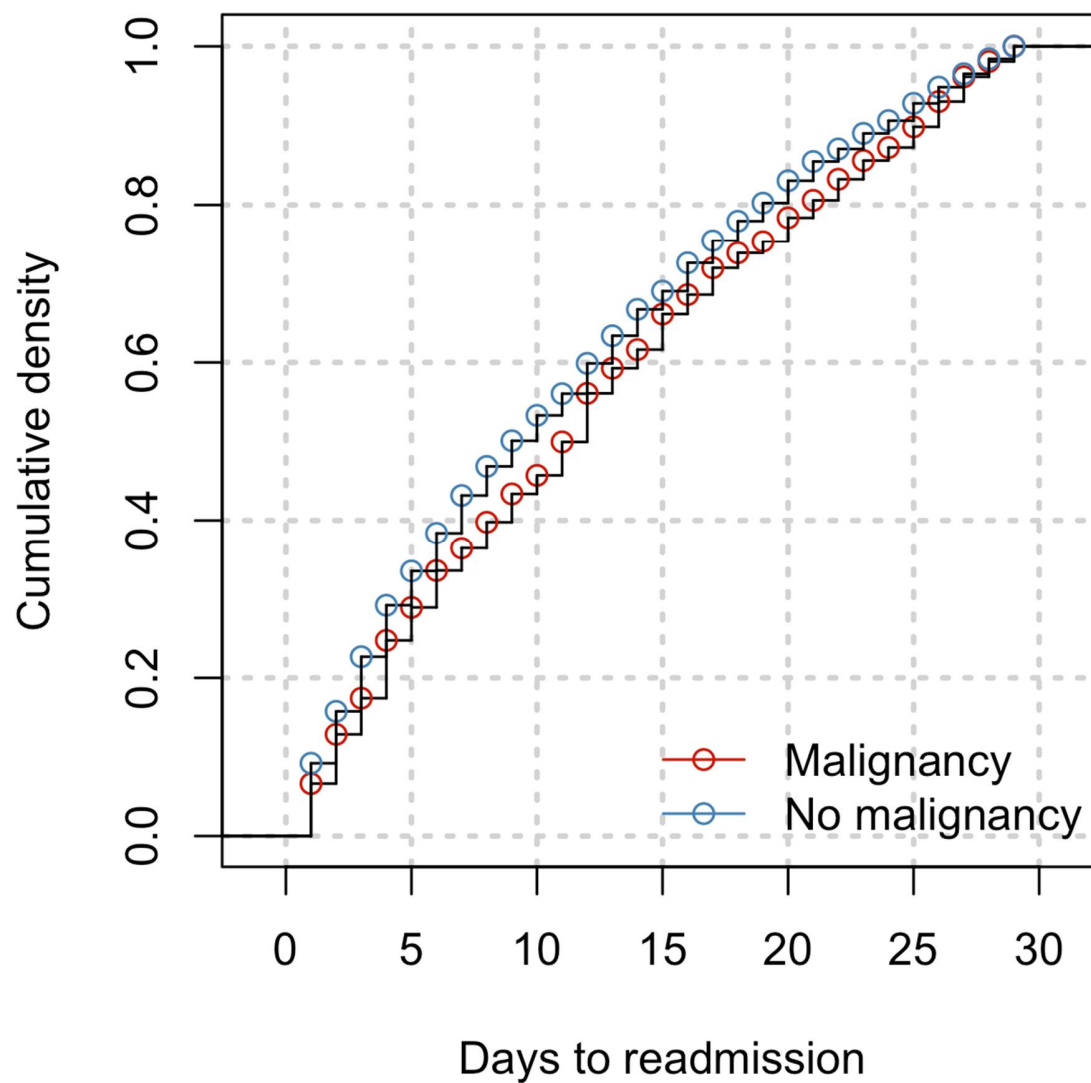

**Table S1. Independent Predictors of In-hospital Mortality After Index Hospitalization With Takotsubo Syndrome**

| Variables                 | Unadjusted OR | Lower CI | Higher CI | P value | Adjusted OR | Lower CI | Higher CI | P value |
|---------------------------|---------------|----------|-----------|---------|-------------|----------|-----------|---------|
| Malignancy                | 1.96          | 1.56     | 2.46      | <0.001  | 1.68        | 1.29     | 2.17      | <0.001  |
| Age≥70 yrs                | 1.81          | 1.49     | 2.19      | <0.001  | 1.85        | 1.49     | 2.30      | <0.001  |
| Smoking                   | 0.71          | 0.58     | 0.88      | <0.001  | 0.72        | 0.57     | 0.91      | 0.006   |
| Fluid and electrolyte     | 3.80          | 3.17     | 4.56      | <0.001  | 2.06        | 1.67     | 2.55      | <0.01   |
| Pulmonary Circ Disease    | 3.81          | 2.65     | 5.48      | <0.001  | 1.86        | 1.18     | 2.93      | 0.008   |
| Chronic Pulmonary disease | 1.41          | 1.15     | 1.74      | <0.001  | 1.31        | 1.04     | 1.65      | 0.022   |
| Cardiogenic shock         | 11.26         | 9.18     | 13.82     | <0.001  | 5.80        | 4.53     | 7.43      | <0.001  |
| Cardiac arrest            | 16.88         | 13.10    | 21.74     | <0.001  | 8.63        | 6.34     | 11.76     | <0.001  |
| Arrhythmia                | 2.66          | 2.19     | 3.24      | <0.001  | 1.62        | 1.31     | 2.01      | <0.001  |

Abbreviations: OR, odds ratio; CI, confidence interval.

**Table S2. Independent Predictors of 30-Day Total Mortality After Index Hospitalization With Takotsubo Syndrome\***

| Variables                 | Unadjusted OR | Lower CI | Higher CI | P value | Adjusted OR | Lower CI | Higher CI | P value |
|---------------------------|---------------|----------|-----------|---------|-------------|----------|-----------|---------|
| Malignancy                | 1.93          | 1.55     | 2.42      | <0.001  | 1.62        | 1.25     | 2.10      | <0.001  |
| Age≥70 yrs                | 1.87          | 1.55     | 2.26      | <0.001  | 1.88        | 1.51     | 2.34      | <0.001  |
| Smoking                   | 0.75          | 0.63     | 0.93      | <0.001  | 0.77        | 0.62     | 0.96      | 0.019   |
| Fluid and electrolyte     | 3.74          | 3.14     | 4.45      | <0.001  | 2.15        | 1.76     | 2.63      | <0.001  |
| Pulmonary Circ Disease    | 3.85          | 2.68     | 5.55      | <0.001  | 1.90        | 1.22     | 2.96      | <0.001  |
| Chronic pulmonary disease | 1.58          | 1.31     | 1.90      | <0.001  | 1.45        | 1.18     | 1.79      | <0.001  |
| Cardiogenic shock         | 9.39          | 7.66     | 11.51     | <0.001  | 4.82        | 3.78     | 6.16      | <0.001  |
| Cardiac arrest            | 14.18         | 11.08    | 18.16     | <0.001  | 7.60        | 5.64     | 10.26     | <0.001  |
| Arrhythmia                | 2.47          | 2.05     | 2.97      | <0.001  | 1.52        | 1.24     | 1.85      | <0.001  |
| Family Hx of CAD          | 0.36          | 0.21     | 0.63      | <0.001  | 0.58        | 0.34     | 0.98      | 0.042   |

Abbreviations: OR, odds ratio; CI, confidence interval; CAD, coronary artery disease.

\*Thirty-day total mortality included inhospital mortality and 30-day readmission mortality together.

**Table S3. Causes of Readmission in all takotsubo syndrome patients**

| <b>Causes of Readmission</b>                                   | <b>CCS codes</b>                                                          | <b>Frequency (%)</b> |
|----------------------------------------------------------------|---------------------------------------------------------------------------|----------------------|
| <b>Cardiac causes</b>                                          |                                                                           | <b>21.6</b>          |
| Heart failure                                                  | 108                                                                       | 10.62                |
| Arrhythmia                                                     | 106                                                                       | 4.70                 |
| Angina and Chronic Ischemic Heart Disease                      | 101                                                                       | 2.60                 |
| Acute myocardial infarction                                    | 100                                                                       | 2.23                 |
| Non-specific chest pain                                        | 102                                                                       | 1.93                 |
| Cardiac arrest                                                 | 107                                                                       | 1.10                 |
| <b>Other cardiac causes</b>                                    |                                                                           | <b>9.0</b>           |
| Other circulatory (heart) disease/Complication of hypertension | 98, 99, 104, 117                                                          | 2.83                 |
| Syncope                                                        | 245                                                                       | 0.73                 |
| Myocarditis/pericarditis                                       | 97                                                                        | 0.70                 |
| Valvular heart disease                                         | 96                                                                        | 0.45                 |
| Conduction disorder                                            | 105                                                                       | 0.40                 |
| <b>Non-cardiac causes</b>                                      |                                                                           | <b>69.4</b>          |
| Infectious                                                     | 2, 4, 122, 135, 148, 159, 197, 201                                        | 19.76                |
| Respiratory                                                    | 103, 127, 128, 129*, 130, 131, 133, 134                                   | 12.44                |
| Others                                                         | 81, 85, 199, 205, 211, 212, 231, 248, 251, 252, 259, N/S                  | 6.9                  |
| Gastrointestinal                                               | 120, 138, 140, 141, 145, 146, 149, 151, 152, 153, 154, 155, 230, 246, 250 | 6.39                 |
| Endocrine/Metabolic                                            | 50, 51, 55, 58                                                            | 4.4                  |
| Neuropsychiatric/Substance                                     | 83, 95, 242, 653, 657, 659, 660, 661                                      | 3.42                 |
| Genitourinary                                                  | 157, 158, 163, 164                                                        | 3.08                 |
| Hematologic/oncologic                                          | 19, 42, 45, 59, 60, 62                                                    | 1.99                 |
| Stroke/Transient ischemic attack                               | 109, 110, 112, 113                                                        | 1.56                 |
| Peripheral vascular disease                                    | 114, 115, 116, 118                                                        | 1.48                 |
| Trauma                                                         | 226, 233, 234, 244                                                        | 1                    |
| Complication of medical procedure or implant/graft             | 237, 238                                                                  | 8.8                  |
| Rehabilitation                                                 | 254                                                                       | 1.14                 |

\*Aspiration pneumonitis (CCS 129) was included in the respiratory problem.

**Table S4. Causes of Readmission in takotsubo syndrome patients with malignancy**

| <b>Causes of Readmission</b>                                   | <b>CCS codes</b>                                                          | <b>Frequency (%)</b> |
|----------------------------------------------------------------|---------------------------------------------------------------------------|----------------------|
| <b>Cardiac causes</b>                                          |                                                                           | <b>18.3</b>          |
| Heart failure                                                  | 108                                                                       | 8.1                  |
| Arrhythmia                                                     | 106                                                                       | 4.9                  |
| Angina and Chronic Ischemic Heart Disease                      | 101                                                                       | 1.8                  |
| Acute myocardial infarction                                    | 100                                                                       | 0.8                  |
| Non-specific chest pain                                        | 102                                                                       | 2.6                  |
| Cardiac arrest                                                 | 107                                                                       | 0.1                  |
| <b>Other cardiac causes</b>                                    |                                                                           | <b>6.2</b>           |
| Other circulatory (heart) disease/Complication of hypertension | 98, 99, 104, 117                                                          | 4.3                  |
| Syncope                                                        | 245                                                                       | 0.2                  |
| Myocarditis/pericarditis                                       | 97                                                                        | 1.6                  |
| Valvular heart disease                                         | 96                                                                        | 0.1                  |
| Conduction disorder                                            | 105                                                                       | 0                    |
| <b>Non-cardiac causes</b>                                      |                                                                           | <b>75.5</b>          |
| Infectious                                                     | 2, 4, 122, 135, 148, 159, 197, 201                                        | 20.1                 |
| Respiratory                                                    | 103, 127, 128, 129*, 130, 131, 133, 134                                   | 8.4                  |
| Others                                                         | 81, 85, 199, 205, 211, 212, 231, 248, 251, 252, 259, N/S                  | 10.9                 |
| Gastrointestinal                                               | 120, 138, 140, 141, 145, 146, 149, 151, 152, 153, 154, 155, 230, 246, 250 | 7.8                  |
| Endocrine/Metabolic                                            | 50, 51, 55, 58                                                            | 3.1                  |
| Neuropsychiatric/Substance                                     | 83, 95, 242, 653, 657, 659, 660, 661                                      | 3.8                  |
| Genitourinary                                                  | 157, 158, 163, 164                                                        | 4.6                  |
| Hematologic/oncologic                                          | 19, 42, 45, 59, 60, 62                                                    | 6.7                  |
| Stroke/Transient ischemic attack                               | 109, 110, 112, 113                                                        | 2.5                  |
| Peripheral vascular disease                                    | 114, 115, 116, 118                                                        | 1.2                  |
| Trauma                                                         | 226, 233, 234, 244                                                        | 0.9                  |
| Complication of medical procedure or implant/graft             | 237, 238                                                                  | 5.5                  |
| Rehabilitation                                                 | 254                                                                       | 0                    |

\*Aspiration pneumonitis (CCS 129) was included in the respiratory problem.

**Table S5. Causes of Readmission in takotsubo syndrome patients without malignancy**

| <b>Causes of Readmission</b>                                   | <b>CCS codes</b>                                                          | <b>Frequency (%)</b> |
|----------------------------------------------------------------|---------------------------------------------------------------------------|----------------------|
| <b>Cardiac causes</b>                                          |                                                                           | <b>22.3</b>          |
| Heart failure                                                  | 108                                                                       | 11.14                |
| Arrhythmia                                                     | 106                                                                       | 3.29                 |
| Angina and Chronic Ischemic Heart Disease                      | 101                                                                       | 2.42                 |
| Acute myocardial infarction                                    | 100                                                                       | 1.67                 |
| Non-specific chest pain                                        | 102                                                                       | 3.5                  |
| Cardiac arrest                                                 | 107                                                                       | 0.28                 |
| <b>Other cardiac causes</b>                                    |                                                                           | <b>9.5</b>           |
| Other circulatory (heart) disease/Complication of hypertension | 98, 99, 104, 117                                                          | 6.46                 |
| Syncope                                                        | 245                                                                       | 0.87                 |
| Myocarditis/pericarditis                                       | 97                                                                        | 1.55                 |
| Valvular heart disease                                         | 96                                                                        | 0.35                 |
| Conduction disorder                                            | 105                                                                       | 0.27                 |
| <b>Non-cardiac causes</b>                                      |                                                                           | <b>68.1</b>          |
| Infectious                                                     | 2, 4, 122, 135, 148, 159, 197, 201                                        | 12.04                |
| Respiratory                                                    | 103, 127, 128, 129*, 130, 131, 133, 134                                   | 12.41                |
| Others                                                         | 81, 85, 199, 205, 211, 212, 231, 248, 251, 252, 259, N/S                  | 8.8                  |
| Gastrointestinal                                               | 120, 138, 140, 141, 145, 146, 149, 151, 152, 153, 154, 155, 230, 246, 250 | 9.45                 |
| Endocrine/Metabolic                                            | 50, 51, 55, 58                                                            | 3.7                  |
| Neuropsychiatric/Substance                                     | 83, 95, 242, 653, 657, 659, 660, 661                                      | 4.75                 |
| Genitourinary                                                  | 157, 158, 163, 164                                                        | 3.62                 |
| Hematologic/oncologic                                          | 19, 42, 45, 59, 60, 62                                                    | 0.99                 |
| Stroke/Transient ischemic attack                               | 109, 110, 112, 113                                                        | 3.96                 |
| Peripheral vascular disease                                    | 114, 115, 116, 118                                                        | 2.33                 |
| Trauma                                                         | 226, 233, 234, 244                                                        | 1.2                  |
| Complication of medical procedure or implant/graft             | 237, 238                                                                  | 4.85                 |
| Rehabilitation                                                 | 254                                                                       | 0.11                 |

\*Aspiration pneumonitis (CCS 129) was included in the respiratory problem.

**Tale S6. Costs and Charges over 30-days after Index Hospitalization for Takotsubo syndrome with or without Malignancy**

| Outcomes                                                                   | Overall              | TTS with malignancy | TTS without malignancy | P Value† |
|----------------------------------------------------------------------------|----------------------|---------------------|------------------------|----------|
| <b>Number of patients, n (%)</b>                                           | 61583 (100)          | 7542 (12.2)         | 54041 (87.8)           |          |
| <b>Charge (index hospitalization), \$</b>                                  | 39498 (25935-68521)* | 46876 (28416-87536) | 38593 (25481-66425)    | <0.001   |
| <b>Cumulative charges (index hospitalization + 30-day readmission), \$</b> | 41830 (26501-75167)  | 50936 (29819-97989) | 40735 (26160-72619)    | <0.001   |
| <b>Cost (index hospitalization), \$</b>                                    | 11427 (7999-17933)   | 13344 (8909-24171)  | 11194 (7900-17933)     | <0.001   |
| <b>Cumulative costs (index hospitalization + 30-day readmission), \$</b>   | 11998 (8181-20564)   | 14686 (9294-27337)  | 11704 (8065-19630)     | <0.001   |

Abbreviations: TTS, Takotsubo syndrome.

\*All values are shown as a median (interquartile range).

†Mann-Whitney-Wilcoxon test was used in all comparisons.
